# Supplementary figures and images for: Effects of Type 2 Diabetes on 12-Year Cognitive Change
Source: Oxford University Press journal article supplement (doi:10.2337/dc12-0746), 2012-12-29

# SUPPLEMENTARY DATA

**Supplementary Figure 1.** Patient recruitment flow chart.

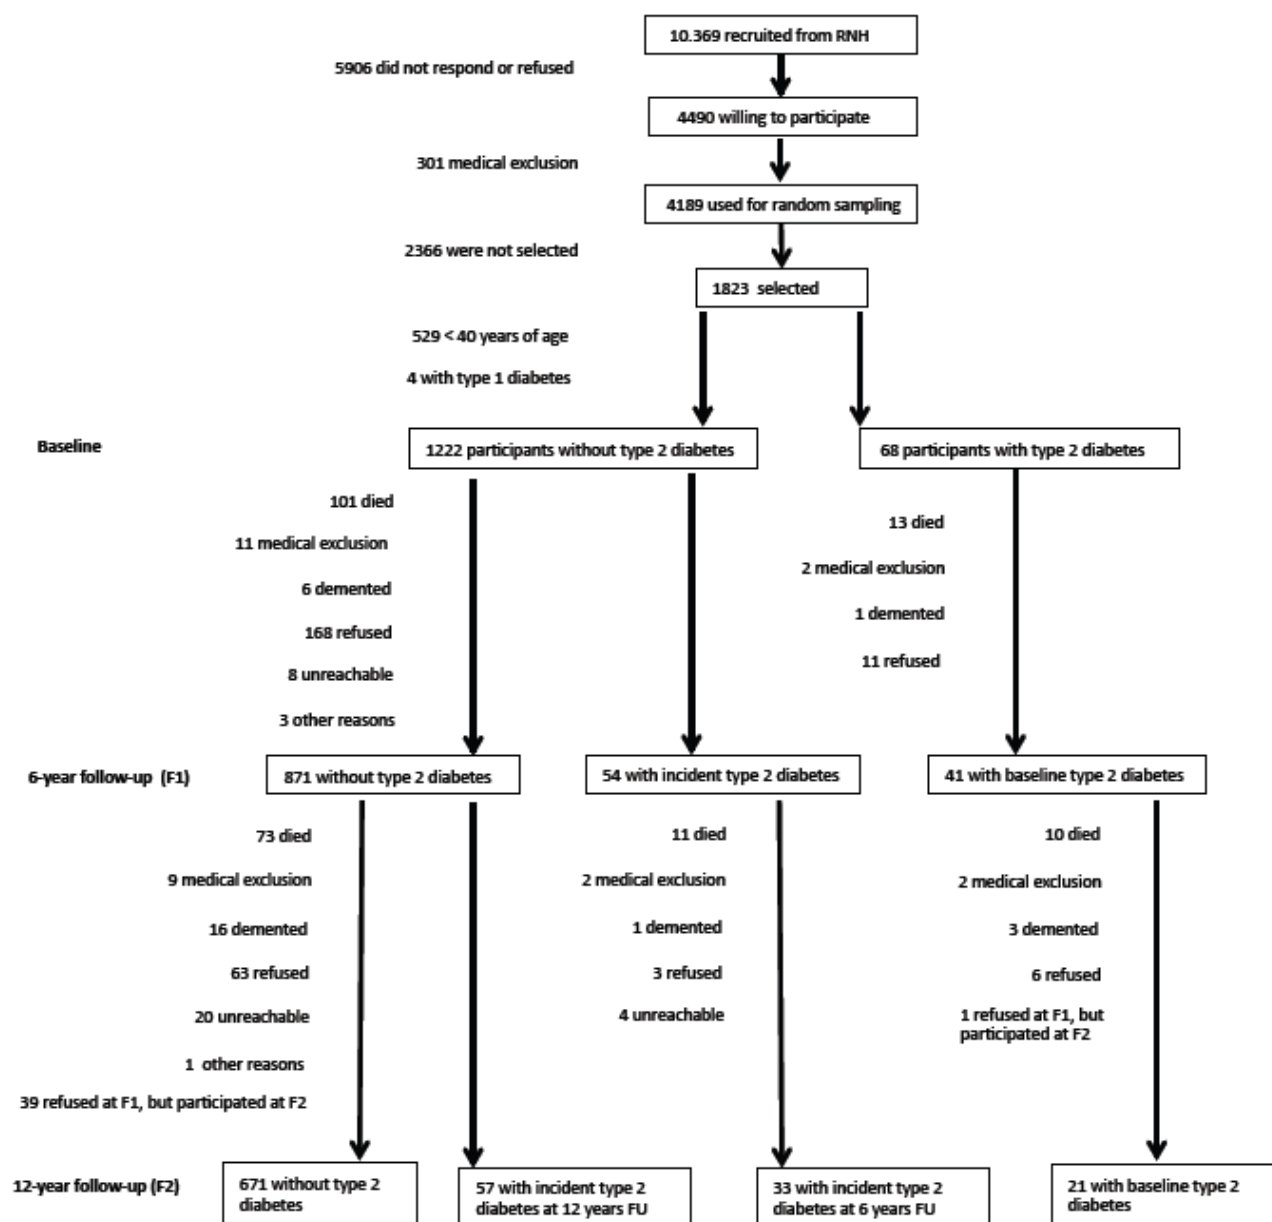

Supplement: dc120746supplementarydata.pdf [file dc120746supplementarydata.pdf]
